# Supplementary material for: Differential Interaction of Platelet-Derived Extracellular Vesicles With Circulating Immune Cells: Roles of TAM Receptors, CD11b, and Phosphatidylserine
Source: PubMed Central journal article supplement (PMC6297748; doi:10.3389/fimmu.2018.02797), 2018-12-11
Supplement: Data_Sheet_1.pdf [file Data_Sheet_1.pdf]

*Supplementary Material*

**Differential Interaction of Platelet-Derived Extracellular Vesicles with  
Circulating Immune Cells:  
Roles of TAM Receptors, CD11b, and Phosphatidylserine**

**Birgit Fendl<sup>1</sup>, Tanja Eichhorn<sup>1</sup>, René Weiss<sup>1</sup>, Carla Tripisciano<sup>1</sup>, Andreas Spittler<sup>2</sup>, Michael B. Fischer<sup>1</sup>, Viktoria Weber<sup>1\*</sup>**

<sup>1</sup>Christian Doppler Laboratory for Innovative Therapy Approaches in Sepsis, Department for Biomedical Research, Danube University Krems, Krems, Austria

<sup>2</sup>Core Facility Flow Cytometry & Surgical Research Laboratories, Medical University of Vienna, Vienna, Austria

\* **Correspondence:** Prof. Dr. Viktoria Weber: [viktoria.weber@donau-uni.ac.at](mailto:viktoria.weber@donau-uni.ac.at)

**Supplementary Table S1. Antibodies used for flow cytometry, confocal microscopy, blocking experiments, and Western Blotting.** n.s., clone not specified.

| Flow Cytometry       |                          |                                     |                                 |              |                                 |
|----------------------|--------------------------|-------------------------------------|---------------------------------|--------------|---------------------------------|
| Antigen              | Clone                    | Marker for                          | Fluorochrome                    | Abbreviation | Supplier                        |
| CD11b                | CBRM1/5                  | activated CD11b                     | Fluorescein Isothiocyanate      | FITC         | BioLegend                       |
| CD14                 | RMO52                    | monocytes                           | Phycoerythrin                   | PE           | Beckman Coulter                 |
| CD14                 | RMO52                    | monocytes                           | Allophycocyanin Alexa Fluor 750 | APC AF750    | Beckman Coulter                 |
| CD16                 | 3G8                      | monocytes                           | Phycoerythrin Cyanin 5.1        | PC5          | Beckman Coulter                 |
| CD41                 | P2                       | platelets                           | Phycoerythrin Cyanin 7          | PC7          | Beckman Coulter                 |
| CD45                 | J33                      | leukocytes                          | Pacific Blue                    | PB           | Beckman Coulter                 |
| CD66b                | 80H3                     | granulocytes                        | Allophycocyanin                 | APC          | Beckman Coulter                 |
| CD235a               | HIR2 (GA-R2)             | erythrocytes                        | Allophycocyanin                 | APC          | eBioscience                     |
| Axl                  | 108724                   | Axl                                 | Alexa Fluor 488                 | AF488        | R&D Systems                     |
| lactadherin          | -                        | phosphatidylserine                  | Fluorescein Isothiocyanate      | FITC         | Haematologic Technologies, Inc. |
| MERTK                | 590H11G1E3               | Mer                                 | Phycoerythrin Cyanin 7          | PC7          | BioLegend                       |
| TIM4                 | 9F4                      | TIM4                                | Phycoerythrin                   | PE           | BioLegend                       |
| Tyro3/Dtk            | 96201                    | Tyro3                               | Phycoerythrin                   | PE           | R&D Systems                     |
| Confocal Microscopy  |                          |                                     |                                 |              |                                 |
| Antigen              | Clone                    | Marker for                          | Fluorochrome                    | Abbreviation | Supplier                        |
| CD14                 | RMO52                    | monocytes                           | Phycoerythrin                   | PE           | Beckman Coulter                 |
| CD41                 | MEM06                    | platelets                           | Alexa Fluor 488                 | AF488        | Abcam                           |
| CD45                 | J33                      | leukocytes                          | Pacific Blue                    | PB           | Beckman Coulter                 |
| CD66b                | REA306                   | granulocytes                        | Phycoerythrin                   | PE           | Miltenyi                        |
| lactadherin          |                          | phosphatidylserine                  | Alexa Fluor 647                 | AF647        | Haematologic Technologies, Inc. |
| Blocking Experiments |                          |                                     | Western Blot                    |              |                                 |
| Antigen              | Clone                    | Supplier                            | Antigen                         | Clone        | Supplier                        |
| CD11b                | CBRM1/5                  | BioLegend                           | Axl                             | polyclonal   | R&D Systems                     |
| Axl                  | n.s.<br>polyclonal       | Bio-Rad Antibodies<br>R&D Systems   | Mer                             | Y323         | Abcam                           |
| Mer                  | 125508<br>Y323<br>125518 | R&D Systems<br>Abcam<br>R&D Systems | Tyro3                           | polyclonal   | R&D Systems                     |
| Tyro3                | 96201<br>polyclonal      | R&D Systems<br>R&D Systems          | CD63                            | Ts63         | Invitrogen                      |
|                      |                          |                                     | CD81                            | 1.3.3.22     | Invitrogen                      |
|                      |                          |                                     | Alix                            | OT1A4        | Bio-Rad Antibodies              |
|                      |                          |                                     | $\alpha$ Actinin-1              | H-2          | Santa Cruz                      |

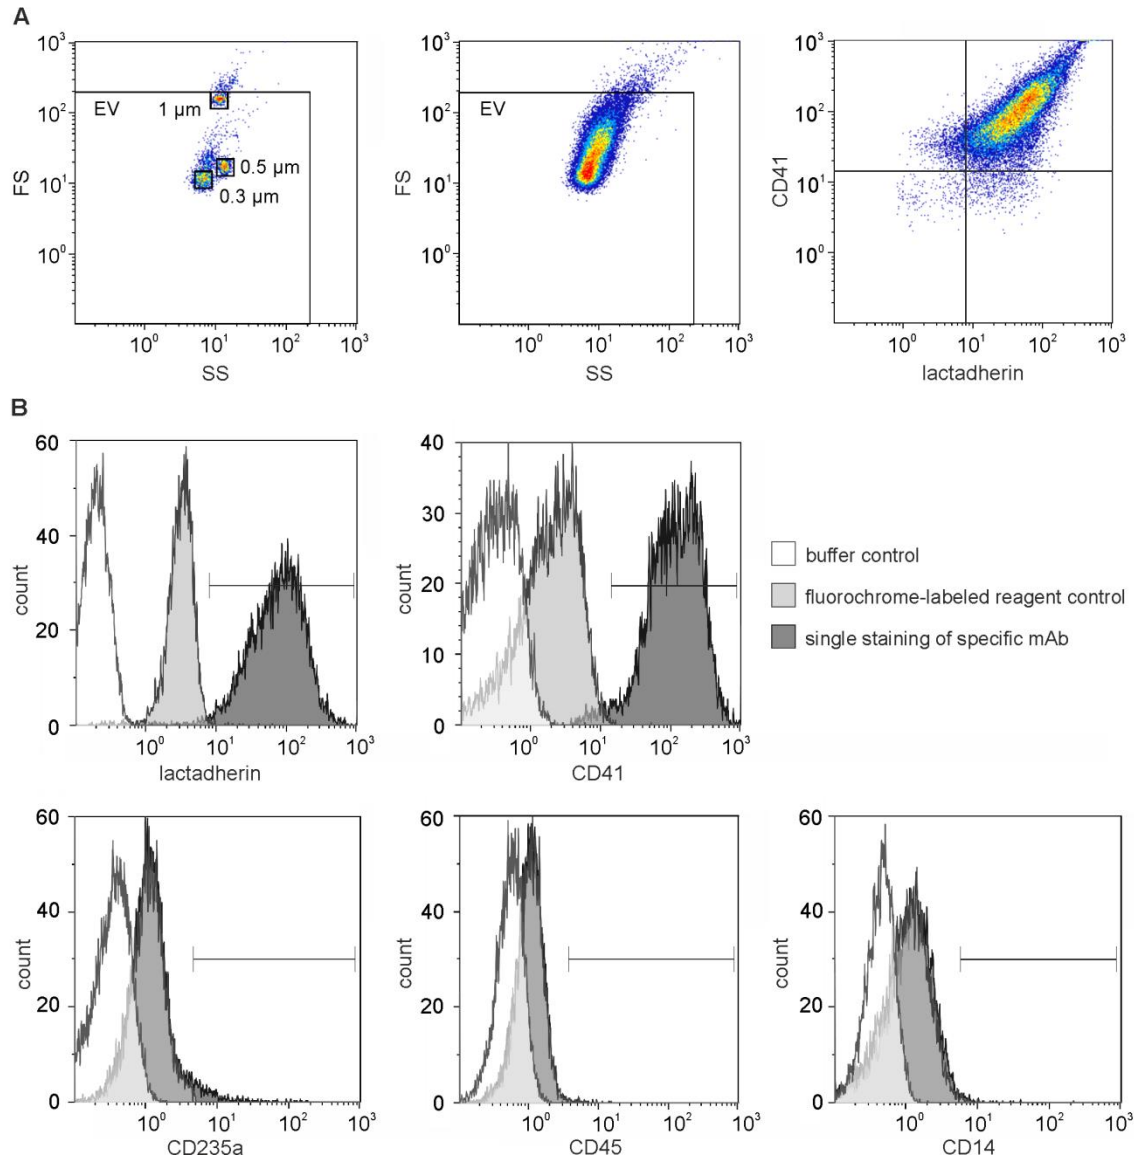

**Supplementary Figure S1. Calibration and controls for the flow cytometric characterization of extracellular vesicles from platelet concentrate.** (A) Flow cytometric characterization was performed on a Gallios Flow Cytometer (Beckman Coulter) after calibration with fluorescent-green silica particles (0.3, 0.5, and 1.0  $\mu\text{m}$ ), and the EV gate was set below the 1  $\mu\text{m}$  bead cloud as described in the Methods section (left panel). Staining of platelet-derived EVs was performed with lactadherin as marker for phosphatidylserine in combination with an anti-CD41 monoclonal antibody (mAb) as platelet marker. A representative forward scatter vs. side scatter (FS vs. SS) dot plot (middle panel) as well as a CD41 vs. lactadherin dot plot (right panel) are shown. (B) The respective buffer controls, fluorochrome labeled reagent controls, and single stainings are shown (upper panel). To assess the presence of EVs derived from other blood cells, CD235a was used as a red blood cell marker, CD45 as leukocyte marker, and CD14 was used as monocyte marker (lower panel). Bars indicate positive expression.

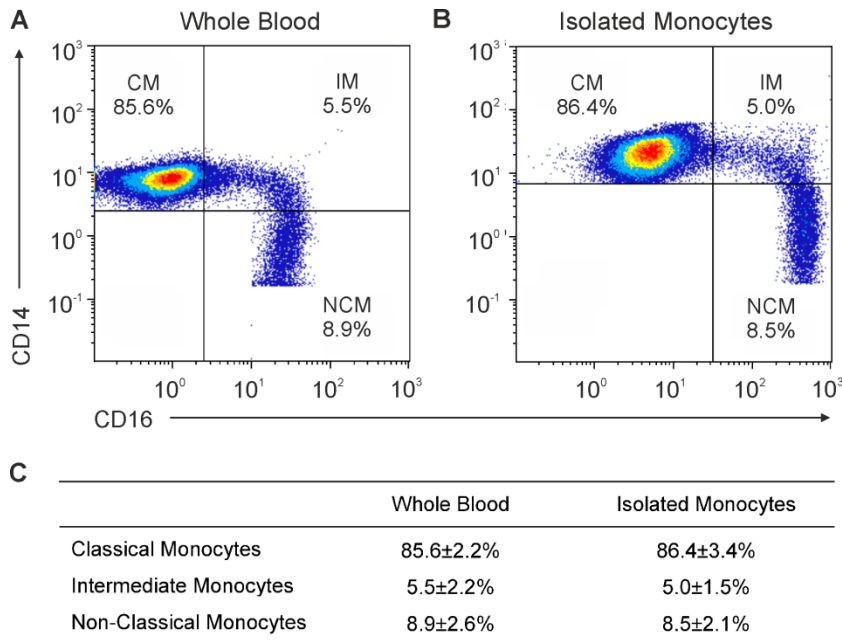

**Supplementary Figure S2. Flow cytometric characterization of monocyte subsets in whole blood and after monocyte isolation.** Monocyte subsets were identified based on their expression patterns of CD14 and CD16 either directly in whole blood or after isolation by density gradient centrifugation and negative depletion as described in the Methods section to discriminate classical (CM), intermediate (IM), and non-classical (NCM) monocytes. **(A)** Distribution of monocyte subsets in whole blood; **(B)** monocyte subset distribution in freshly isolated monocytes. **(C)** Summary of monocyte subset distribution ( $n=7$ ). Data are indicated as mean  $\pm$  standard deviation.

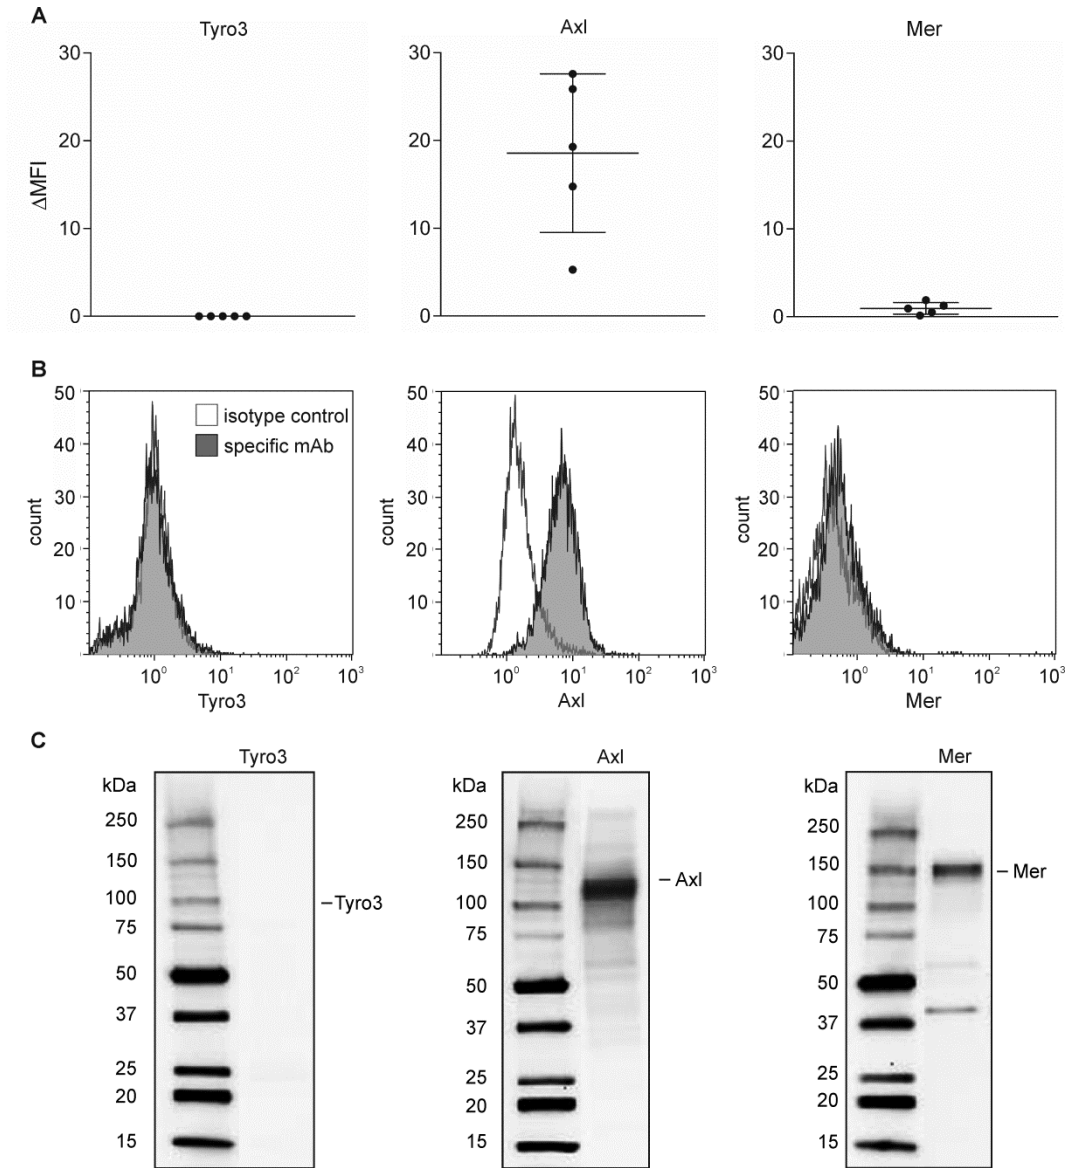

**Supplementary Figure S3. Expression of TAM receptors on endothelial cells.** (A) TAM receptor expression on human umbilical vein endothelial cells (HUVEC) was assessed by flow cytometry as described in the Methods section. Endothelial cells were labeled with Tyro3-PE, Axl-AF488, or Mer-PC7 monoclonal antibodies (mAb), specified in Table S1 ( $n=5$ ).  $\Delta$ MFI refers to the difference in mean fluorescence intensity between the fluorochrome-labeled specific antibodies and the corresponding isotype controls. (B) Representative histograms showing the specific receptor expression (grey) and the respective isotype controls (white). (C) Detection of Tyro3, Axl, and Mer on HUVEC using Western Blotting. Ten microgram of protein were loaded per lane.

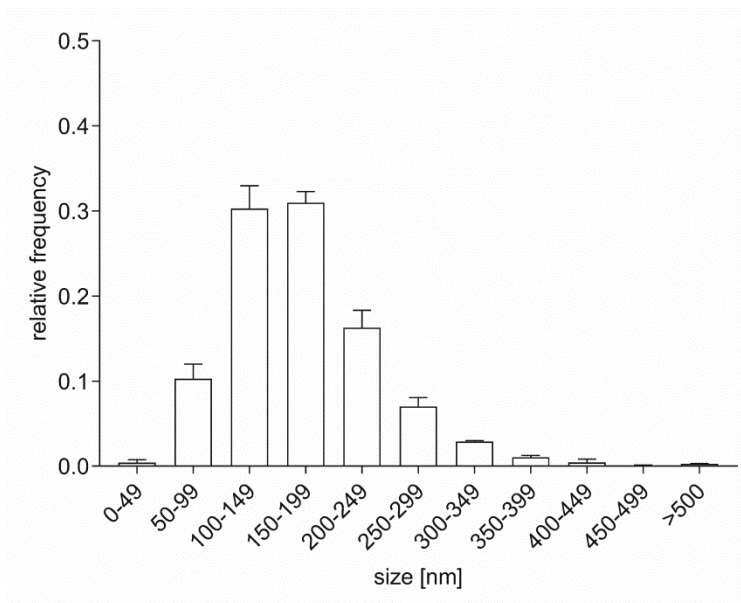

**Supplementary Figure S4. Size distribution of platelet-derived extracellular vesicles.** The size distribution of platelet-derived EVs (EV fraction I, obtained by centrifugation at 20,000 g as described in the Methods section) was analyzed using nanoparticle tracking analysis (Zeta View, Particle Metrix, Inning, Germany). Platelet-derived EVs were diluted to a final concentration of 0.6  $\mu\text{g/ml}$  in PBS<sup>-/-</sup>, and 1 ml of sample was injected into the flow cell. Measurement was performed at 22°C, using the following settings: 80 (sensitivity), 1000 (maximal area), 5 (minimal area), and 25 (brightness). Data were acquired in one cycle of measurement over 11 positions. The software ZetaView 8.04.02. was used for data analysis.

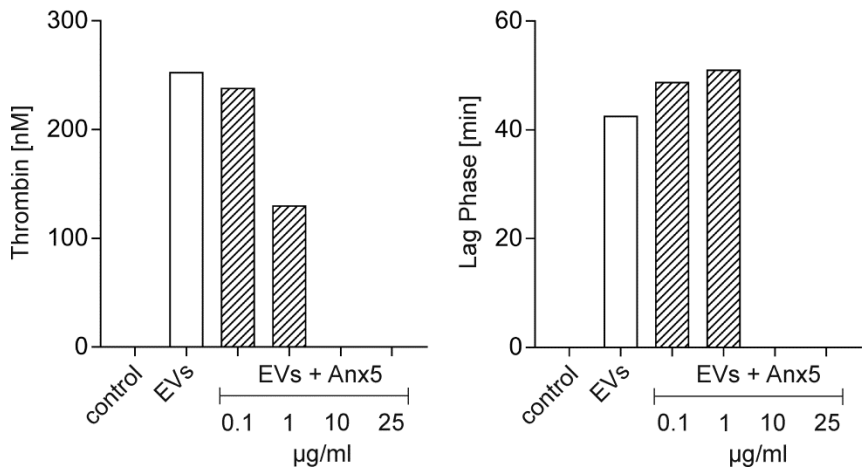

**Supplementary Figure S5. Effect of phosphatidylserine blockade with Anx5 on thrombin generation induced by extracellular vesicles.** The thrombogenicity of platelet-derived EVs was monitored using a thrombin generation assay as described in the Methods section. Pre-incubation of EVs with Anx5 decreased thrombin generation in a dose-dependent manner, indicating efficient masking of phosphatidylserine ( $n=2$ ). Vesicle-free plasma served as control. Anx5, annexin V; EVs, extracellular vesicles.

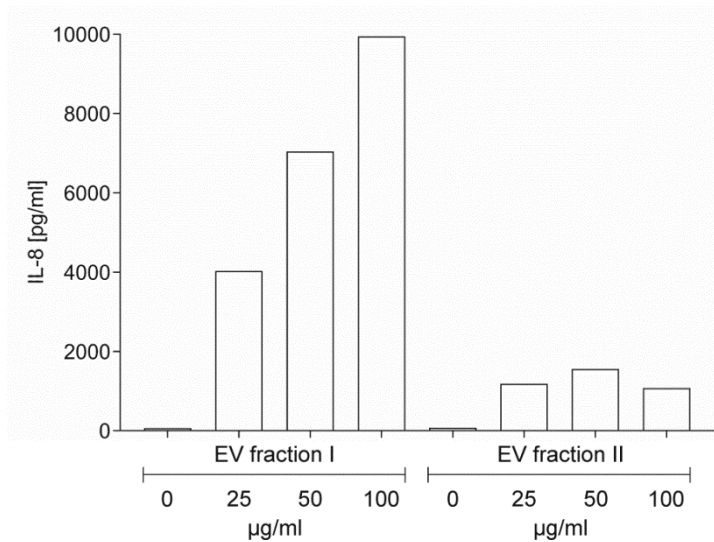

**Supplementary Figure S6. Stimulation of monocytes with isolated extracellular vesicles.**

Monocytes were isolated from human whole blood by density gradient centrifugation and negative depletion as described in the main manuscript (section Monocyte and Granulocyte Isolation). Cells were seeded at a concentration of  $5 \times 10^4$  per 200  $\mu\text{l}$  in RPMI serum free medium in a 96-well flat bottom plate and were stimulated with increasing concentrations of EV fractions I and II (isolated from non-activated platelets as described in the main manuscript, section Isolation and Characterization of Extracellular Vesicles) for 8 h at 37°C in humidified atmosphere. Cell free supernatant was collected by centrifugation, and IL-8 was quantified by bead array assay (Bio-Plex Pro, Bio-Rad Laboratories). Monocytes stimulated with EV fraction I secreted IL-8 in a concentration-dependent manner.
